# Supplementary figures and images for: Branched polystyrenes from suspension “Strathclyde” polymerization using a vulcanization accelerator as a chain transfer agent
Source: Royal Society of Chemistry journal article supplement (doi:10.1039/c8py01639a), 2019-01-01

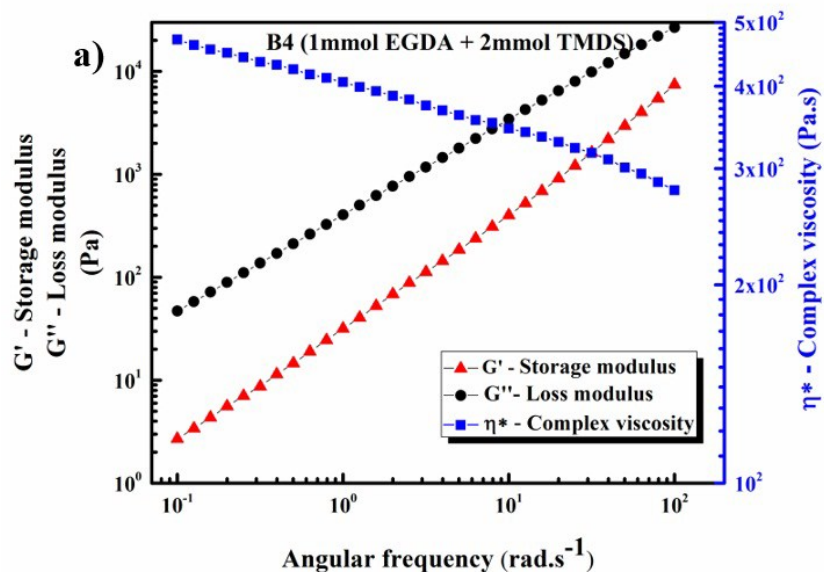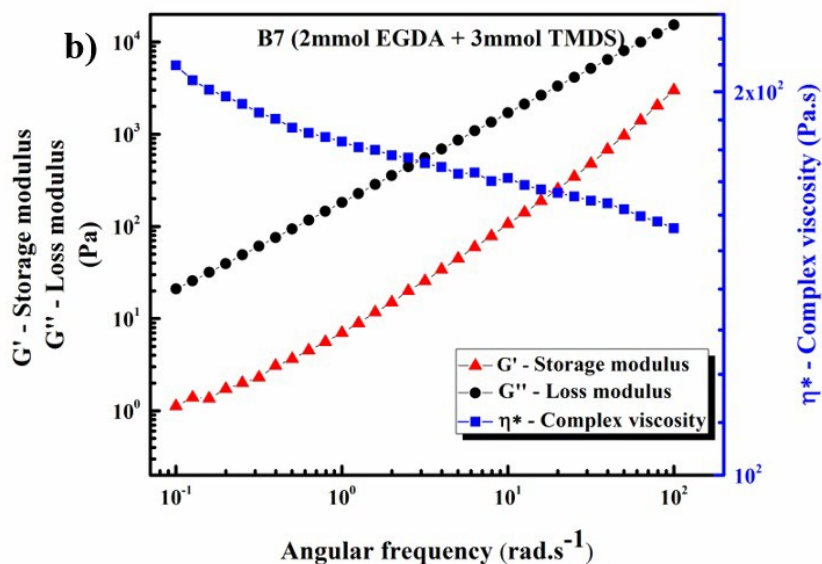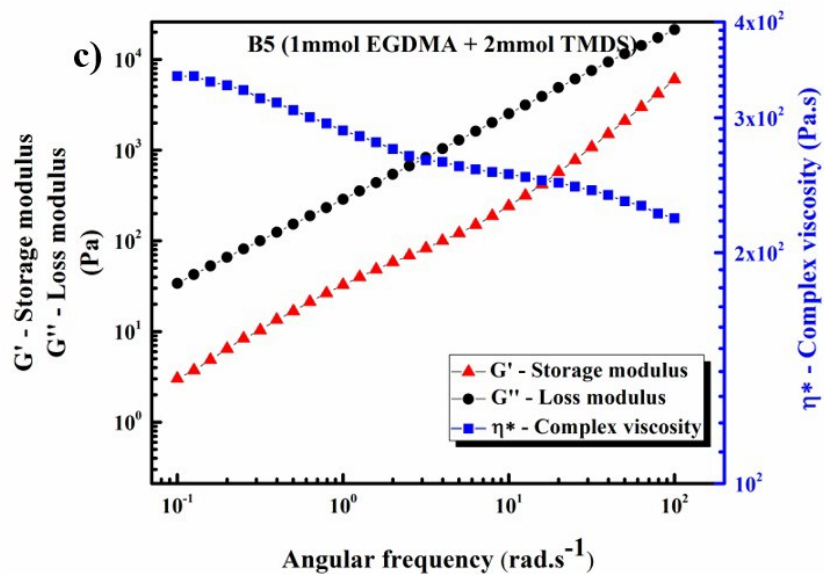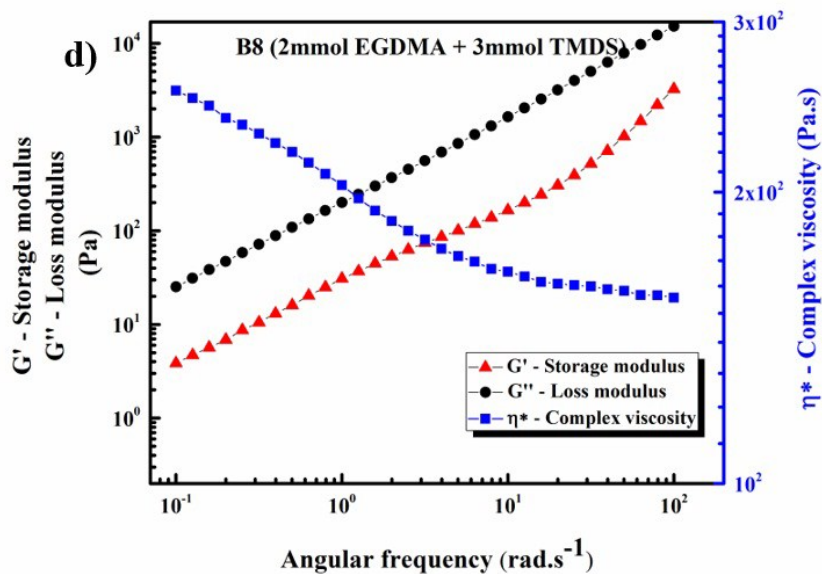

Supplement: c8py01639a4.pdf [file c8py01639a4.pdf]
